# Supplementary material for: Patient perception and treatment convenience of dabigatran versus vitamin K antagonist when used for stroke prophylaxis in atrial fibrillation: Real-world Evaluation of Long-term Anticoagulant Treatment Experience (RE-LATE) study
Source: HighWire-hosted journal article supplement (doi:10.1136/openhrt-2021-001745), 2021-12-01
Supplement: openhrt-2021-001745supp001_data_supplement.pdf [file openhrt-2021-001745supp001_data_supplement.pdf]

## Supplementary materials

### Supplemental table 1. Perception on Anticoagulant Treatment Questionnaire (PACT):

#### Dimensions and individual items

| <b>PACT-Q1</b>                                                                                                                                                                                                                                                                                                                                                                                                                                                                                                                                                                                                                                      | <b>Score range</b>  |
|-----------------------------------------------------------------------------------------------------------------------------------------------------------------------------------------------------------------------------------------------------------------------------------------------------------------------------------------------------------------------------------------------------------------------------------------------------------------------------------------------------------------------------------------------------------------------------------------------------------------------------------------------------|---------------------|
| <p><i>Dimension: Treatment expectations</i></p> <p>A1 – Confidence in prevention of blood clots</p> <p>A2 – Expectations of symptom relief</p> <p>A3 – Expectations of side effects</p> <p>A4 – Importance of ease of use</p> <p>A5 – Worries about making mistakes</p> <p>A6 – Importance of independency</p> <p>A7 – Worries about cost</p>                                                                                                                                                                                                                                                                                                       | All: 1 to 5         |
| <b>PACT-Q2</b>                                                                                                                                                                                                                                                                                                                                                                                                                                                                                                                                                                                                                                      |                     |
| <p><i>Dimension: Convenience</i></p> <p>B1 – Difficulties in taking the treatment</p> <p>B2 – Bother in taking the treatment</p> <p>B3 – Difficulties regarding dose adjustments required</p> <p>B4 – Treatment and other medications</p> <p>B5 – Treatment and regimen implications</p> <p>B6 – Treatment and being away from home</p> <p>B7 – Difficulties regarding daily life</p> <p>B8 – Bother in follow-up required</p> <p>B9 – Difficulties regarding regular intake</p> <p>B10 – Feeling regarding loss of independency</p> <p>B11 – Worries about having to stop the treatment</p> <p>C1 – Impact of side effects on usual activities</p> | One score: 0 to 100 |

|                                                        |                     |
|--------------------------------------------------------|---------------------|
| C2 – Discomfort due to symptoms                        |                     |
| <i>Dimension: Anticoagulant treatment satisfaction</i> | One score: 0 to 100 |
| D1 – Feeling of reassurance                            |                     |
| D2 – Symptom decrease                                  |                     |
| D3 – Experience with side effects                      |                     |
| D4 – Satisfaction regarding independency               |                     |
| D5 – Satisfaction with patient management              |                     |
| D6 – Satisfaction with treatment form                  |                     |
| D7 – Overall satisfaction                              |                     |
